# Supplementary material
Source: PubMed Central journal article supplement (PMC3681929)
Supplement: NIHMS463638-supplement-supplement_1.pdf [file NIHMS463638-supplement-supplement_1.pdf]

| <b>Supplementary Table 1. Reduction in Depressive Symptoms from Baseline to 6 Months</b> |                                      |                                              |                         |                                 |          |          |
|------------------------------------------------------------------------------------------|--------------------------------------|----------------------------------------------|-------------------------|---------------------------------|----------|----------|
| <b>Variable</b>                                                                          | <b>P Value for 3-Way Interaction</b> | <b>Intent-to-Treat Estimates<sup>a</sup></b> |                         |                                 | <b>t</b> | <b>P</b> |
|                                                                                          |                                      | <b>Active Treatment</b>                      | <b>Usual Care</b>       | <b>Between-Group Difference</b> |          |          |
| Change in depressive symptom score (overall)                                             |                                      | -10.1<br>(-12.0 to -8.1)                     | -6.6<br>(-8.5 to -4.8)  | -3.5<br>(-6.1 to -0.7)          | -2.5     | .01      |
| Sex                                                                                      |                                      |                                              |                         |                                 |          |          |
| Male (n = 87)                                                                            | .03                                  | -9.0<br>(-11.5 to -6.5)                      | -7.5<br>(-9.8 to -5.1)  | -1.6<br>(-6.7 to 3.6)           | -0.6     | .55      |
| Female (n = 63)                                                                          |                                      | -11.9<br>(-15.0 to -8.9)                     | -5.6<br>(-8.5 to -2.6)  | -6.4<br>(-10.1 to -2.6)         | -3.4     | <.001    |
| Hispanic                                                                                 |                                      |                                              |                         |                                 |          |          |
| Yes (n = 29)                                                                             | .32                                  | -7.9<br>(-12.0 to -3.8)                      | -7.6<br>(-12.1 to -3.0) | -0.3<br>(-3.5 to 2.8)           | -0.2     | .84      |
| No (n = 120)                                                                             |                                      | -10.6<br>(-12.8 to -8.3)                     | -6.4<br>(-8.4 to -4.4)  | -4.2<br>(-7.2 to -1.1)          | -2.7     | .009     |
| African American                                                                         |                                      |                                              |                         |                                 |          |          |
| Yes (n = 50)                                                                             | .27                                  | -6.9<br>(-10.3 to -3.5)                      | -6.1<br>(-9.1 to -3.0)  | -0.8<br>(-4.1 to 2.5)           | -0.5     | .62      |
| No (n = 100)                                                                             |                                      | -11.4<br>(-13.7 to -9.1)                     | -7.0<br>(-9.3 to -4.7)  | -4.4<br>(-7.8 to -1.0)          | -2.6     | .01      |
| Type of acute coronary syndrome                                                          |                                      |                                              |                         |                                 |          |          |
| Myocardial infarction (n = 77)                                                           | .55                                  | -10.1<br>(-13.0 to -7.3)                     | -5.8<br>(-8.4 to -3.2)  | -4.3<br>(-8.3 to -0.4)          | -2.2     | .03      |
| Unstable angina (n = 70)                                                                 |                                      | -9.9<br>(-12.7 to -7.2)                      | -7.5<br>(-10.3 to -4.7) | -2.4<br>(-6.1 to 1.3)           | -1.3     | .20      |
| Type of myocardial infarction                                                            |                                      |                                              |                         |                                 |          |          |
| ST-segment elevation (n = 40)                                                            | .36                                  | -9.3<br>(-12.8 to -5.8)                      | -7.4<br>(-10.8 to -4.0) | -1.9<br>(-5.3 to 1.5)           | -1.1     | .04      |
| Non-ST-segment elevation (n = 37)                                                        |                                      | -11.3<br>(-15.6 to -6.9)                     | -4.1<br>(-7.7 to -0.4)  | -7.2<br>(-13.9 to -0.5)         | -2.2     | .28      |
| Beck Depression Inventory score at baseline                                              |                                      |                                              |                         |                                 |          |          |
| ≥16 (n = 102)                                                                            | .61                                  | -11.8<br>(-14.3 to -9.2)                     | -8.0<br>(-10.5 to -5.4) | -3.8<br>(-7.2 to -0.4)          | -2.2     | .03      |
| <16 (n = 48)                                                                             |                                      | -5.8                                         | -4.2                    | -1.6                            | -0.9     | .35      |

|                                         |     |     | (-8.3 to -3.2)  | (-6.5 to -1.9)  | (-4.9 to 1.7)   |       |      |
|-----------------------------------------|-----|-----|-----------------|-----------------|-----------------|-------|------|
| Antidepressant use at baseline          |     |     |                 |                 |                 |       |      |
| No (n = 97)                             |     |     | -9.3            | -5.8            | -3.5            | -2.5  | .01  |
|                                         |     |     | (-11.3 to -7.2) | (-7.7 to -3.8)  | (-6.3 to -0.8)  |       |      |
| Yes (n = 53)                            | .42 |     | -7.8            | -6.7            | -1.1            | -0.8  | .42  |
|                                         |     |     | (-11.0 to -4.6) | (-10.1 to -3.3) | (-3.9 to 1.6)   |       |      |
| Any mental health treatment at baseline |     |     |                 |                 |                 |       |      |
| No (n = 94)                             |     |     | -9.4            | -5.5            | -4.0            | -2.7  | .007 |
|                                         |     |     | (-11.6 to -7.3) | (-7.5 to -3.5)  | (-6.8 to -1.1)  |       |      |
| Yes (n = 56)                            | .24 |     | -7.7            | -7.2            | -0.4            | -0.6  | .56  |
|                                         |     |     | (-10.6 to -4.7) | (-10.5 to -3.9) | (-1.9 to 1.0)   |       |      |
| Diabetes                                |     |     |                 |                 |                 |       |      |
| No (n = 80)                             |     |     | -7.9            | -7.0            | -0.9            | -0.5  | .61  |
|                                         |     |     | (-10.5 to -5.3) | (-9.4 to -4.5)  | (-4.6 to 2.7)   |       |      |
| Yes (n = 69)                            | .05 |     | -12.5           | -6.3            | -6.2            | -3.2  | .002 |
|                                         |     |     | (-15.3 to -9.6) | (-9.0 to -3.5)  | (-10.0 to -2.3) |       |      |
| Study site                              |     |     |                 |                 |                 |       |      |
| 1 (n = 32)                              |     |     | -8.2            | -8.6            | 0.4             | -0.04 | .97  |
|                                         |     |     | (-12.0 to -4.3) | (-12.4 to -4.8) | (-20.3 to 21.1) |       |      |
| 2 (n = 40)                              |     |     | -7.2            | -4.3            | -2.9            | -1.0  | .31  |
|                                         |     |     | (-11.3 to -3.1) | (-7.8 to -0.8)  | (-8.5 to 2.7)   |       |      |
| 3 (n = 34)                              |     |     | -9.7            | -5.5            | -4.2            | -1.3  | .18  |
|                                         |     |     | (-13.9 to -5.5) | (-9.5 to -1.5)  | (-10.5 to 2.0)  |       |      |
| 4 (n = 20)                              |     | .58 | -14.6           | -8.6            | -6.0            | -2.1  | .04  |
|                                         |     |     | (-19.4 to -9.8) | (-13.4 to -3.8) | (-11.7 to -0.4) |       |      |
| 5 (n = 24)                              |     |     | -11.1           | -7.4            | -3.6            | -0.9  | .35  |
|                                         |     |     | (-15.6 to -6.5) | (-11.9 to -3.0) | (-11.4 to 4.1)  |       |      |

<sup>a</sup>Data are presented as estimated mean (95% CI) unless otherwise indicated. Multilevel linear mixed models were used to estimate a group × time repeated-measures analysis of variance for the Beck Depression Inventory. Within-subgroup significance tests for change in depressive symptom score are a test of the treatment group × time interaction effect.

**Supplementary Table 2. Health Care Use and Adjusted Costs During 6 Months<sup>a</sup>**

| Characteristic                       | Active Treatment (n=73) |          | Usual Care (n=77)   |          | Difference, \$ (95% CI) | P Value <sup>b</sup> |
|--------------------------------------|-------------------------|----------|---------------------|----------|-------------------------|----------------------|
|                                      | No. (%) of Patients     | Cost, \$ | No. (%) of Patients | Cost, \$ |                         |                      |
| Medications                          |                         |          |                     |          |                         |                      |
| Antidepressant                       | 43 (58.9)               | 401      | 33 (42.8)           | 336      | 68 (-84 to 220)         | .38                  |
| Anxiolytic                           | 18 (24.6)               | 71       | 18 (23.4)           | 32       | 36 (-12 to 83)          | .14                  |
| Any psychotropic                     | 46 (63.0)               | 471      | 39 (50.6)           | 368      | 104 (-59 to 267)        | .21                  |
| Ambulatory visits                    |                         |          |                     |          |                         |                      |
| Mental health                        | 67 (91.8)               | 638      | 21 (27.3)           | 46       | 584 (470 to 697)        | <.001                |
| Primary care                         | 67 (91.8)               | 221      | 72 (93.5)           | 216      | 5 (-30 to 41)           | .76                  |
| Cardiology                           | 60 (82.2)               | 244      | 63 (81.8)           | 248      | -8 (-60 to 44)          | .77                  |
| Any ambulatory care                  | 73 (100)                | 1103     | 77 (100)            | 510      | 581 (450 to 712)        | <.001                |
| Hospital admissions                  |                         |          |                     |          |                         |                      |
| STEMI                                | 0                       |          | 0                   |          | -                       |                      |
| NSTEMI or unstable angina            | 6 (8.2)                 | 1189     | 5 (6.5)             | 1153     | -9 (-1502 to 1485)      | .99                  |
| Stable angina <sup>c</sup>           | 3 (4.1)                 | 98       | 4 (5.2)             | 166      | -62 (-265 to 141)       | .55                  |
| Heart failure                        | 2 (2.7)                 | 300      | 3 (3.9)             | 363      | -162 (-767 to 443)      | .60                  |
| Noncardiac diagnosis <sup>d</sup>    | 8 (10.9)                | 1128     | 12 (15.6)           | 1800     | -777 (-2477 to 923)     | .37                  |
| Any hospitalization                  | 14 (19.2)               | 2715     | 22 (28.6)           | 3480     | -1010 (-3294 to 1274)   | .39                  |
| Revascularization <sup>e</sup>       |                         |          |                     |          |                         |                      |
| PCI or CABG                          | 6 (8.2)                 | 1284     | 4 (5.2)             | 1049     | 202 (-1319 to 1723)     | .79                  |
| Depression Care                      |                         |          |                     |          |                         |                      |
| Medications and mental health visits | 71 (97.3)               | 1110     | 46 (59.7)           | 414      | 687 (466 to 909)        | <.001                |
| Total Cost <sup>f</sup>              |                         | 4289     |                     | 4358     | -325 (-2639 to 1989)    | .78                  |

Abbreviations: CABG, coronary artery bypass grafting; PCI, percutaneous coronary intervention; STEMI, ST-segment elevation myocardial infarction; NSTEMI, non-ST-segment elevation myocardial infarction.

<sup>a</sup>Cost outcomes were adjusted for potential confounding by age, sex, ethnicity, race, marital status, education, baseline Beck Depression Inventory score, type of acute coronary syndrome, and left ventricular ejection fraction using linear regression models.

<sup>b</sup>P values are based on a linear regression model.

<sup>c</sup>Includes hospitalizations for chest pain of unclear cause.

<sup>d</sup>Includes pulmonary embolism, renal failure, uncontrolled diabetes, and other conditions.

<sup>e</sup>Includes hospitalizations for acute coronary syndrome or heart failure, which resulted in revascularization.

<sup>f</sup>Revascularization costs are reflected in hospital admission costs.
